# Supplementary material
Source: MDPI journal article supplement (https://www.mdpi.com/2073-4433/13/3/433)
Supplement: s1 [file s1 › atmosphere-1620197-supplementary.pdf]

Supplementary Material for:

# Secondary Organic and Inorganic Aerosol Formation from a GDI Vehicle Under Different Driving Conditions

Weiham Peng, Cavan McCaffery, Niina Kuittinen, Topi Rönkkö, David R. Cocker and Georgios Karavalakis\*

\*Corresponding: Georgios Karavalakis, Email: gkaraval@cert.ucr.edu

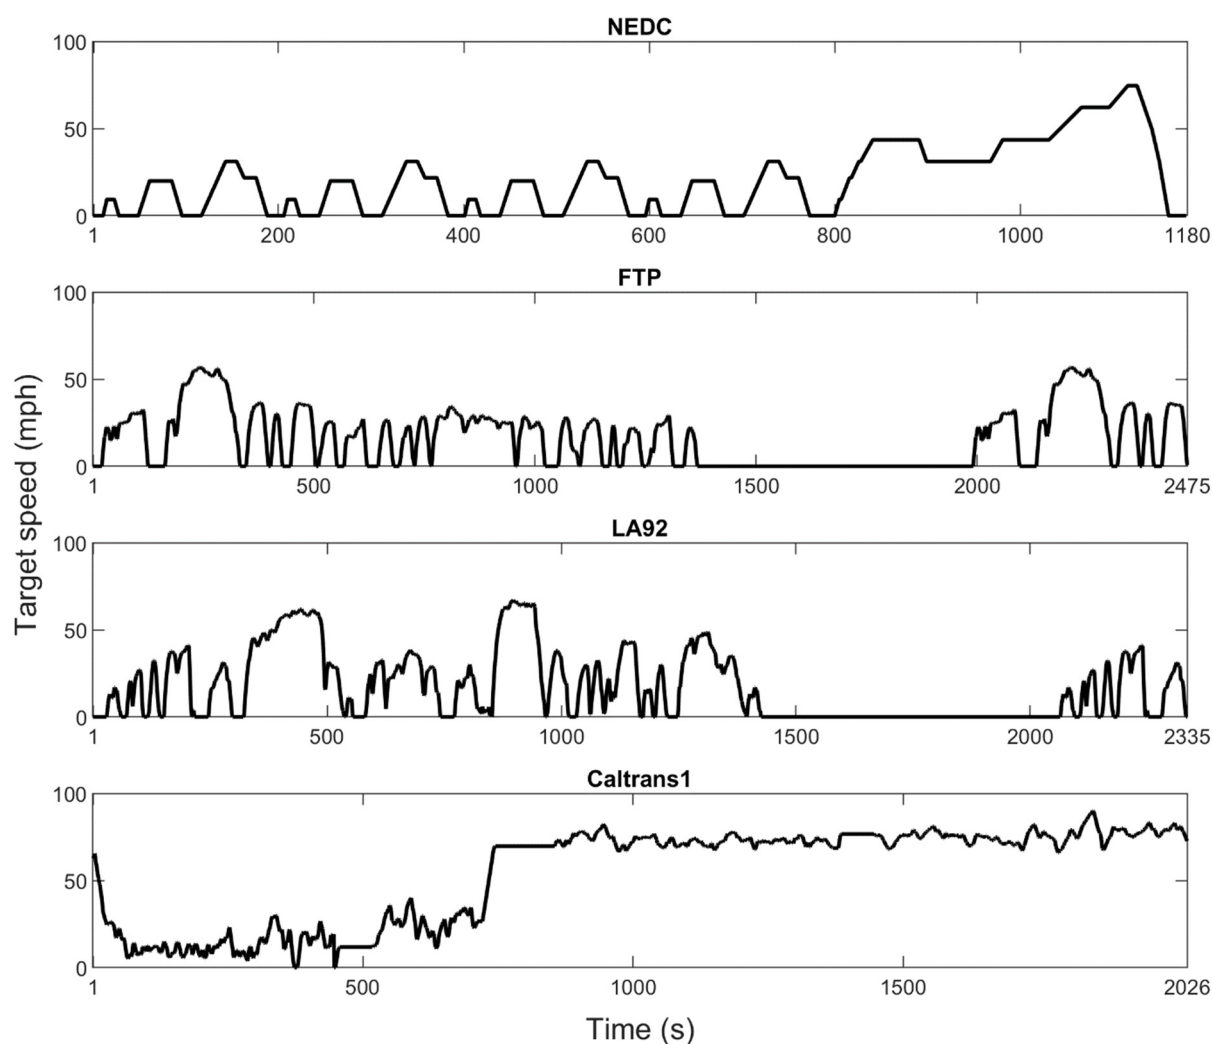

**Figure S1.** Speed-time profiles of the driving cycles.

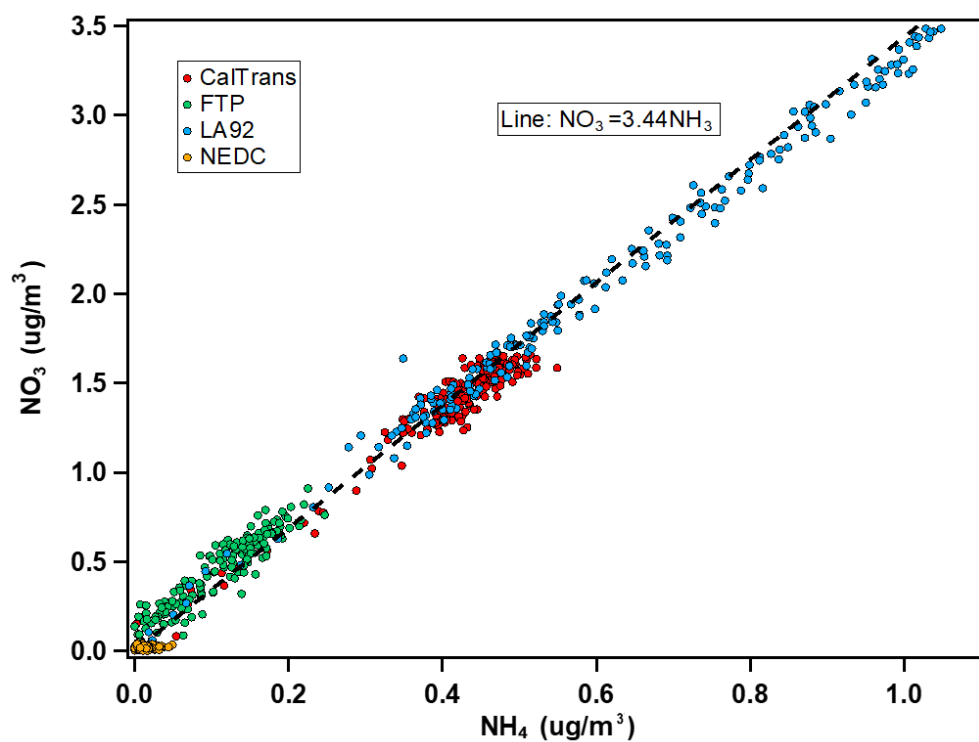

Figure S2. Nitrate and ammonium concentrations in PM during photooxidation.

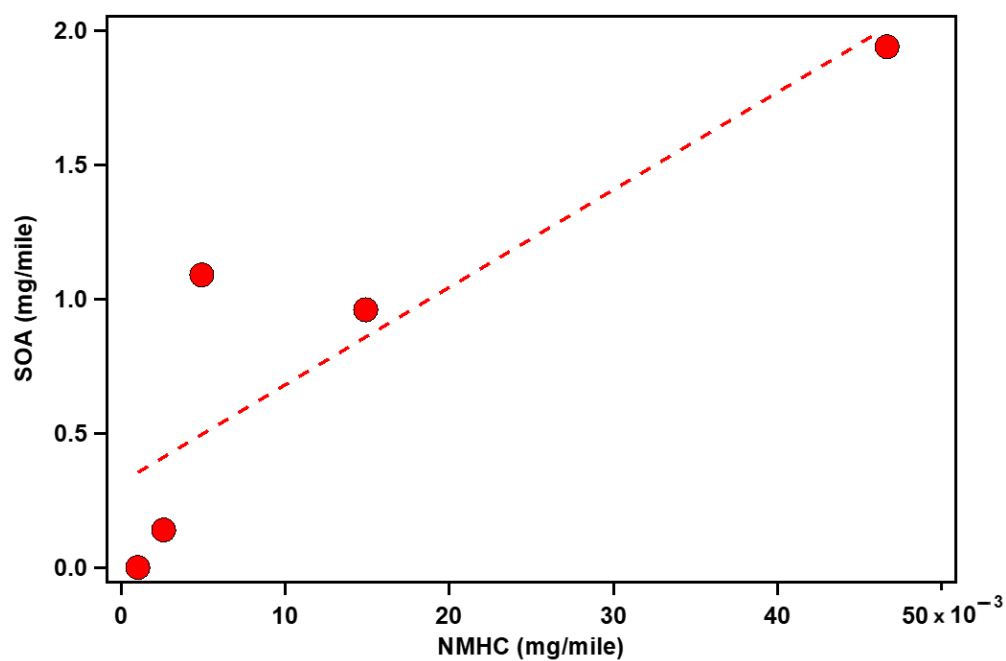

Figure S3. Relationship between SOA emission factor versus tailpipe NMHC emissions.

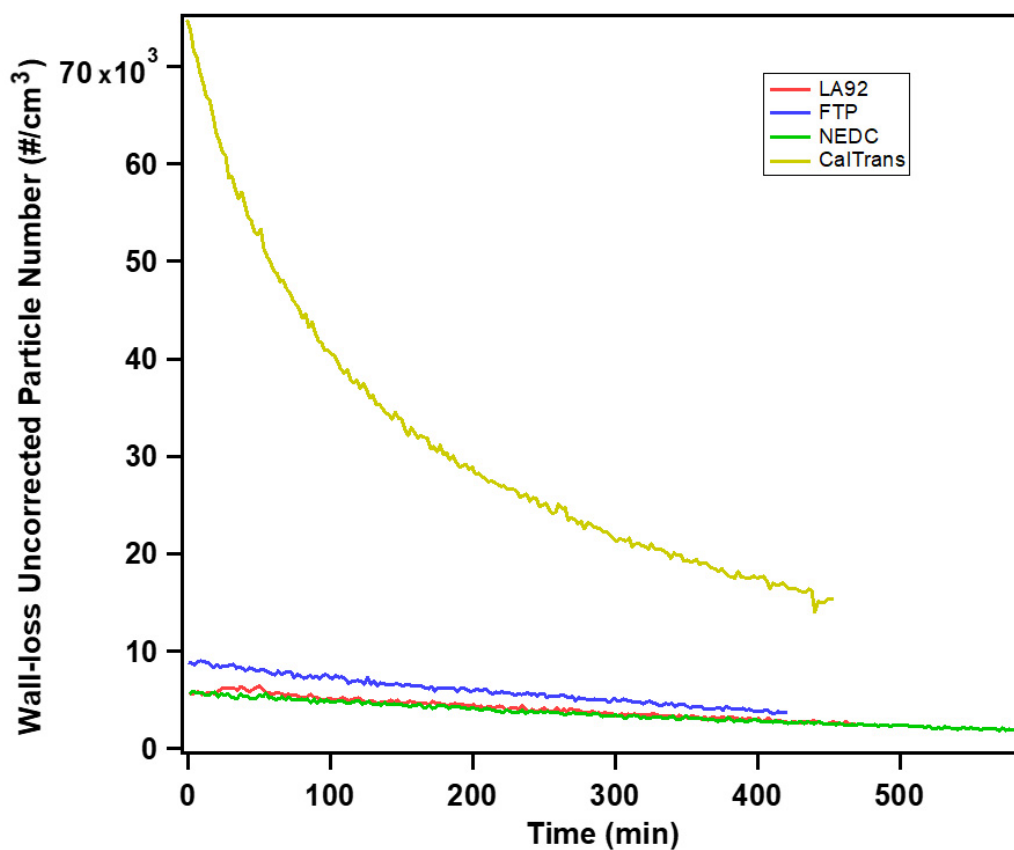

A

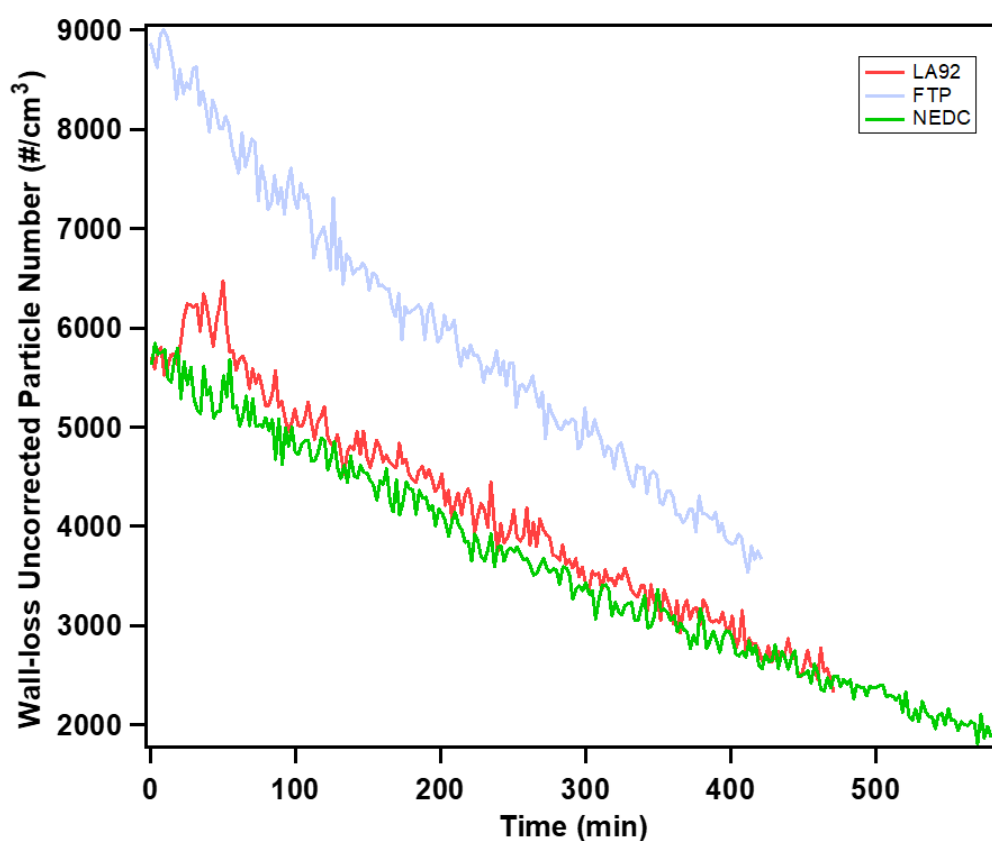

B

**Figure S4.** Wall-loss uncorrected particle number in the environmental chamber; Top panel (A) shows measurements for all driving cycles and bottom panel (B) shows measurements for the NEDC, LA92, and FTP only for improved readability.
